# Supplementary material
Source: ML conference proceedings conference paper supplement (https://openreview.net/forum?id=Tnd3dZxyEv)

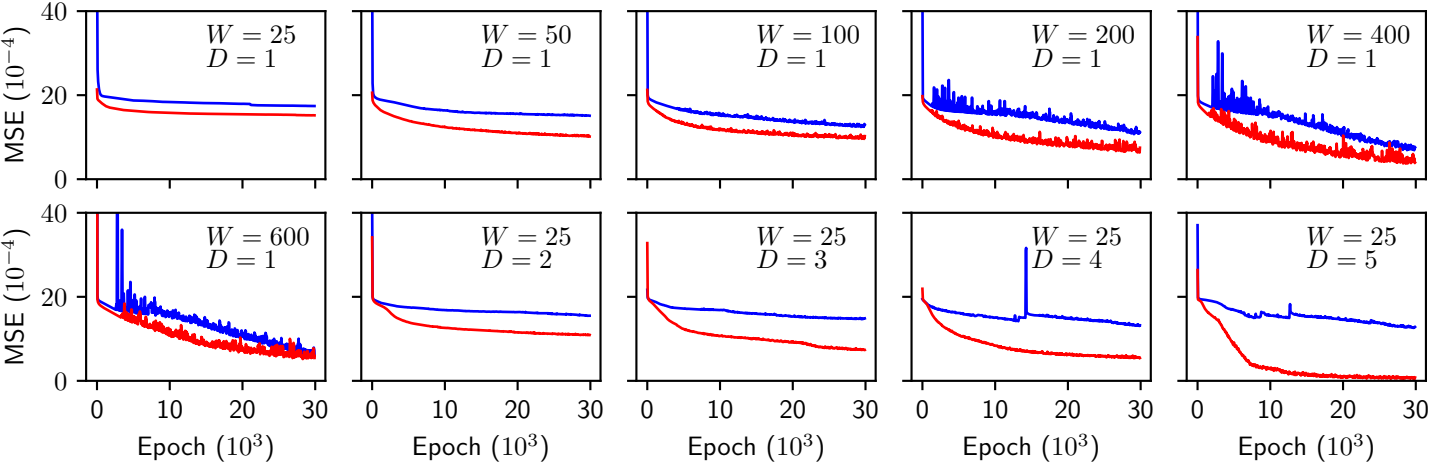

Supplement: supplementary_material [file attachment]

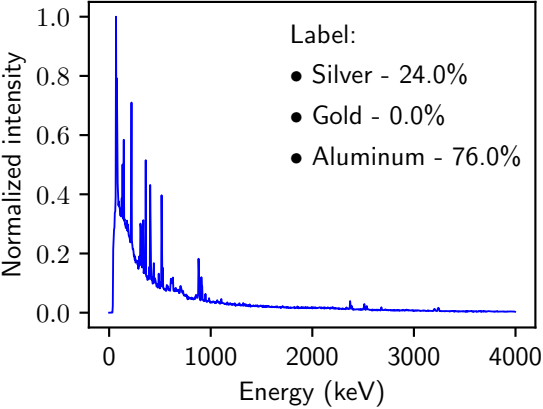

Supplement: supplementary_material [file attachment]

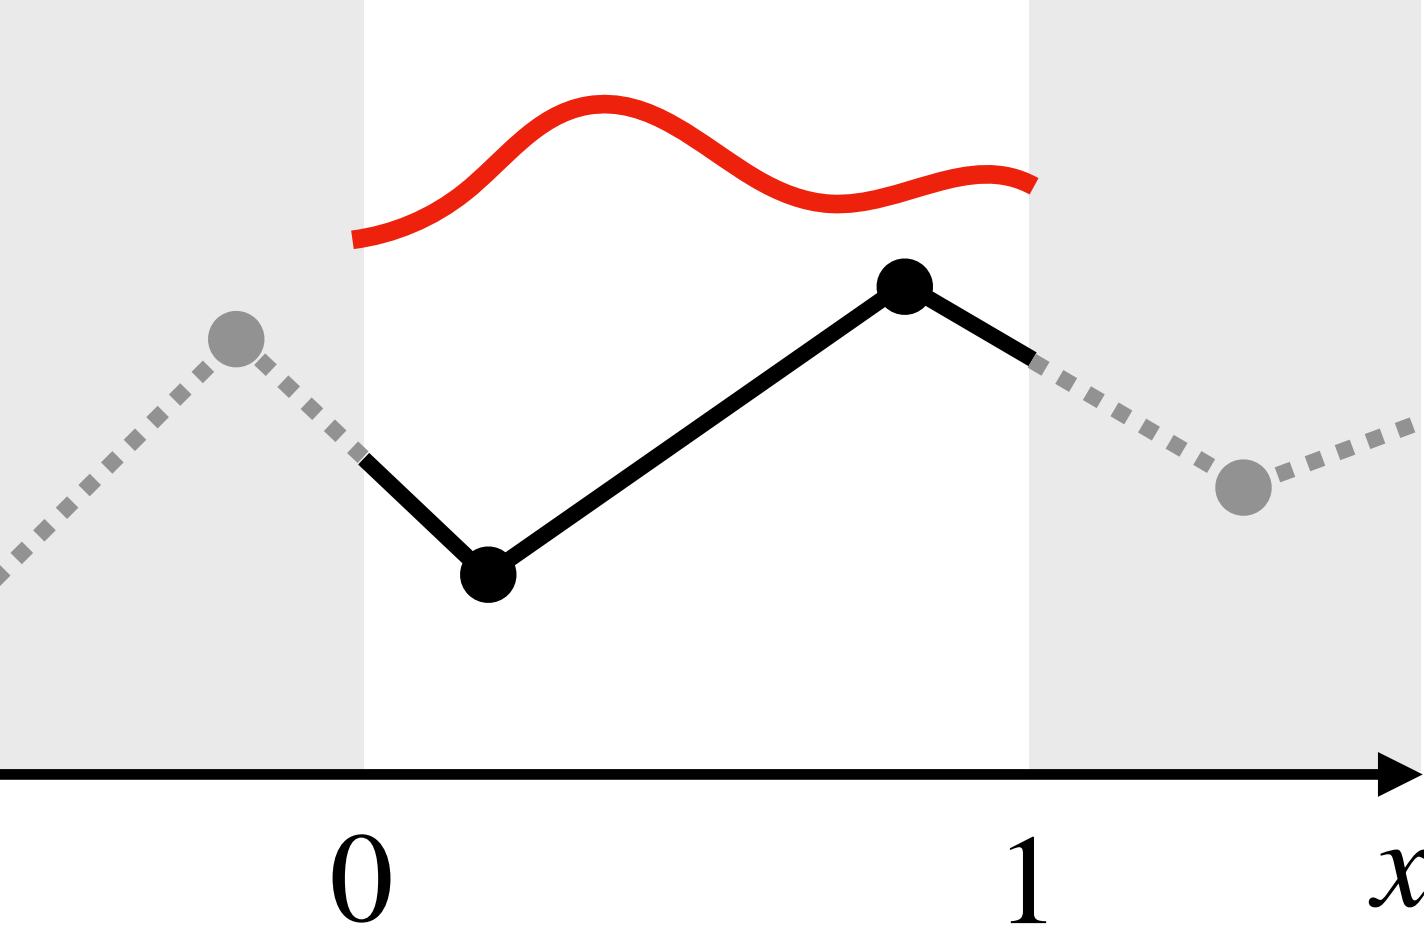

(a) Common initialization

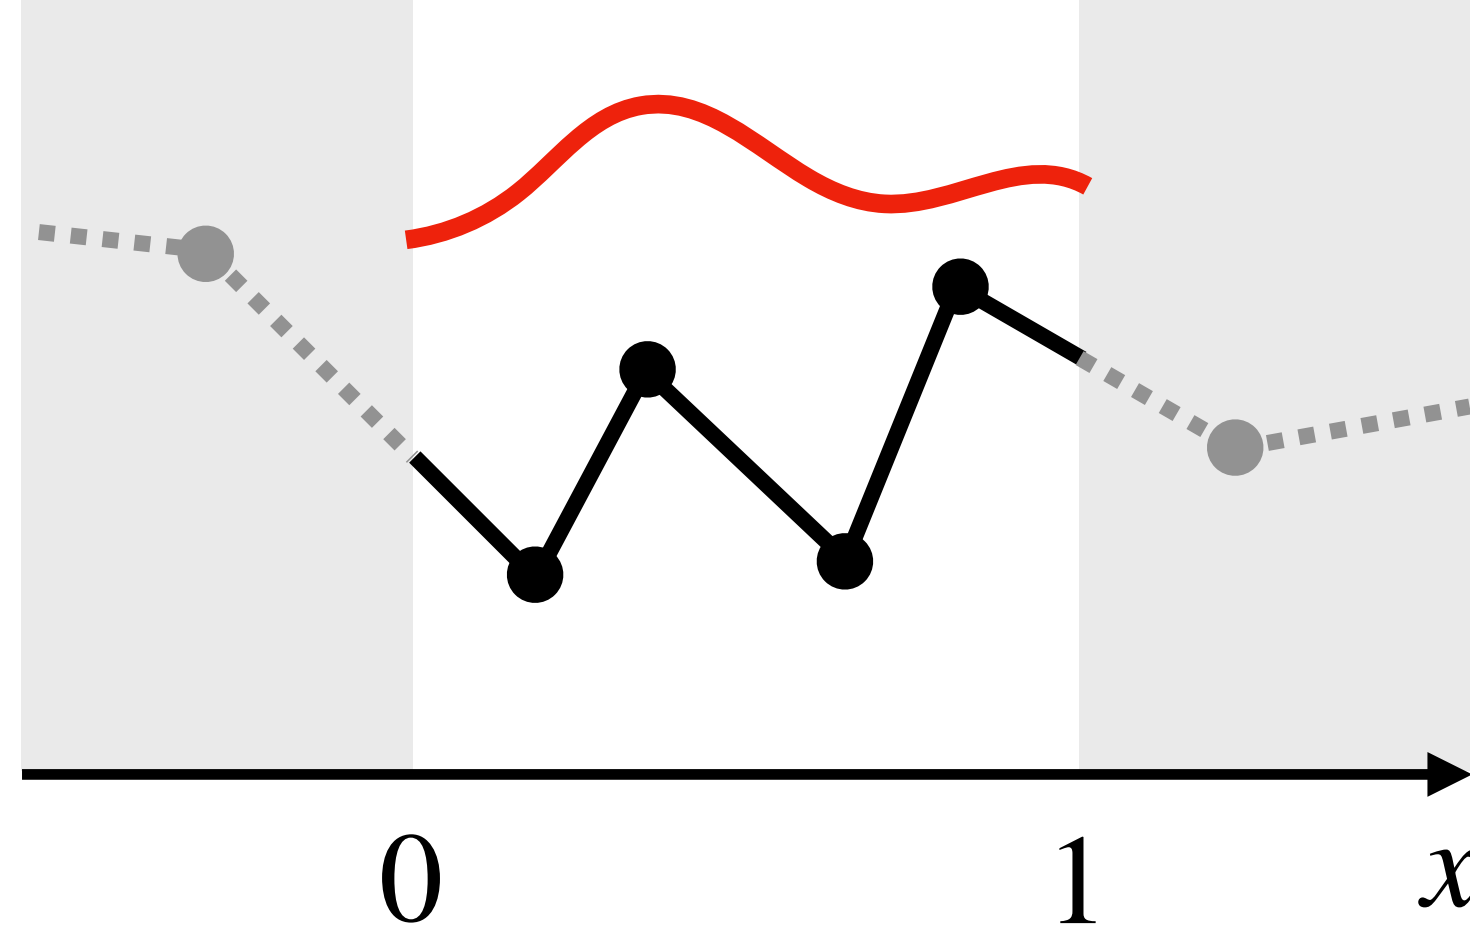

(b) Knot-gathering initialization

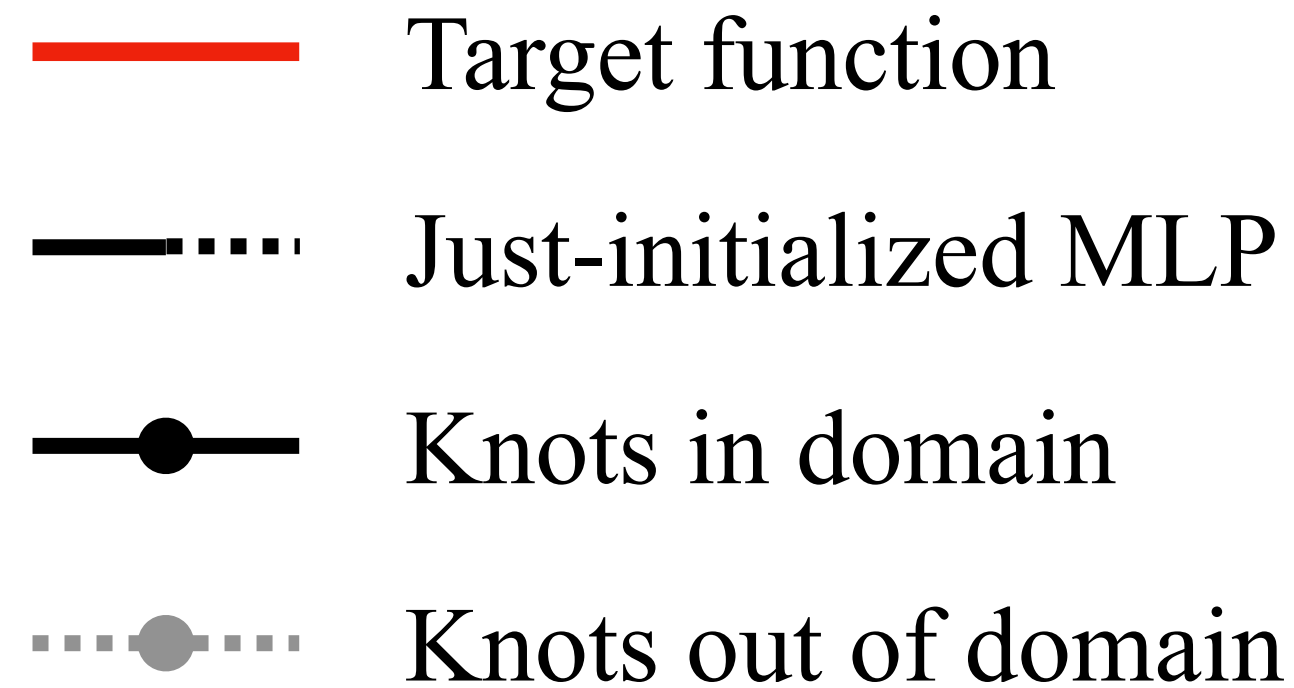

Supplement: supplementary_material [file attachment]

No KGI

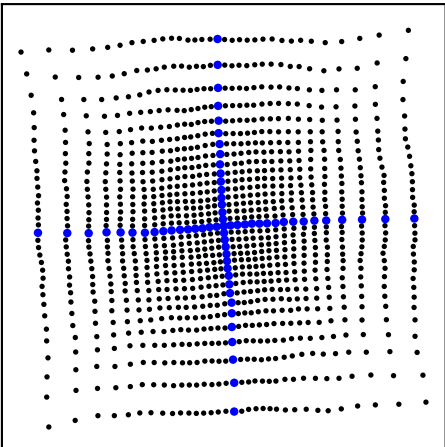

KGI

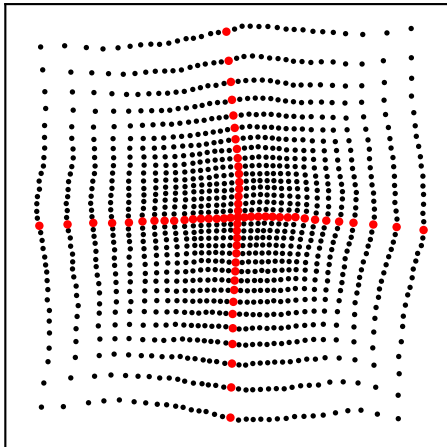

Supplement: supplementary_material [file attachment]

$N_{\text{knot}} = 4$ 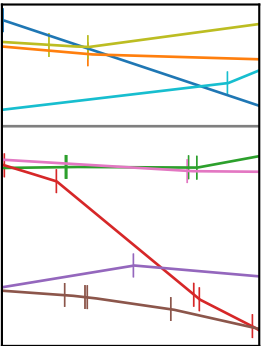No KGI,  $W = 5$  $N_{\text{knot}} = 18$ 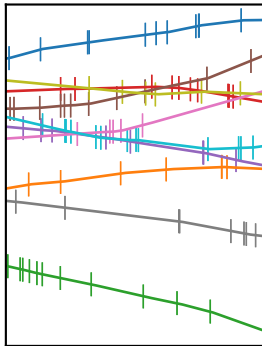No KGI,  $W = 20$  $N_{\text{knot}} = 13$ 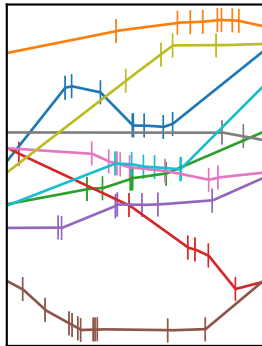KGI,  $W = 5$  $N_{\text{knot}} = 60$ 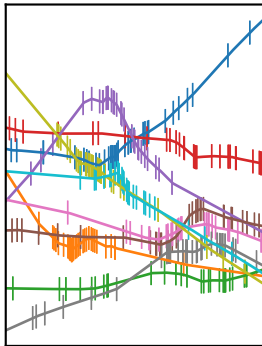KGI,  $W = 20$

Supplement: supplementary_material [file attachment]

CIFAR-10

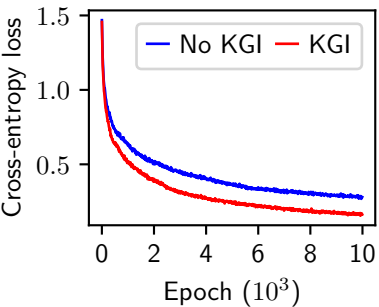

Muon spectroscopy

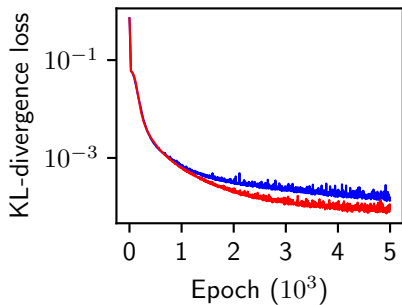

Stokes flow

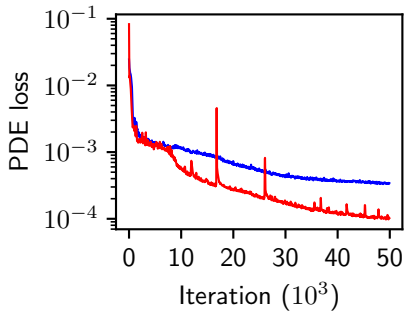

Disentanglement

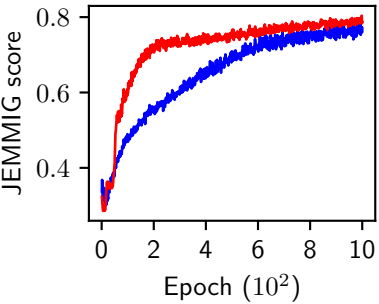

GPT-2 pre-training

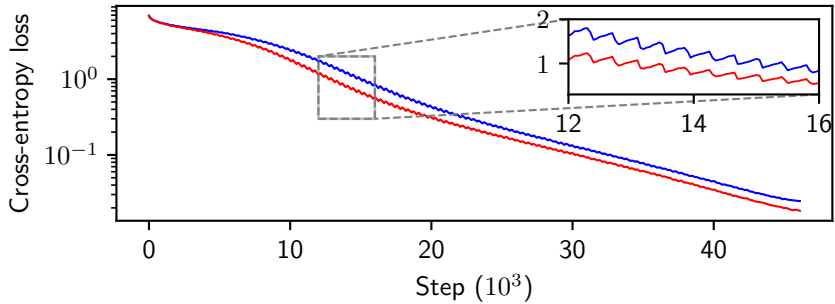

Supplement: supplementary_material [file attachment]

$$N_{\text{knot}} = 4919$$

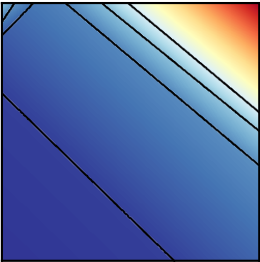

No KGI,  $W = 5$

$$N_{\text{knot}} = 26185$$

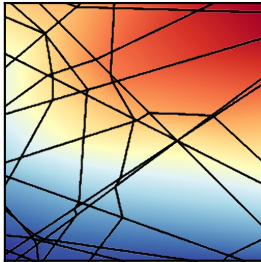

No KGI,  $W = 20$

$$N_{\text{knot}} = 14402$$

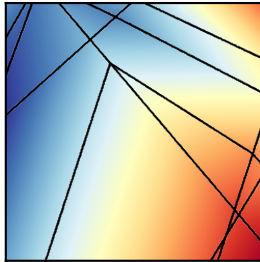

KGI,  $W = 5$

$$N_{\text{knot}} = 61059$$

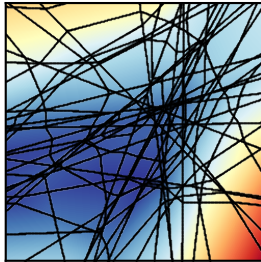

KGI,  $W = 20$

Supplement: supplementary_material [file attachment]

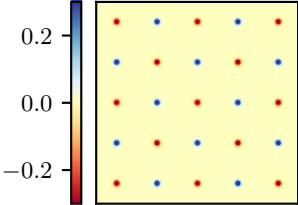

Supplement: supplementary_material [file attachment]

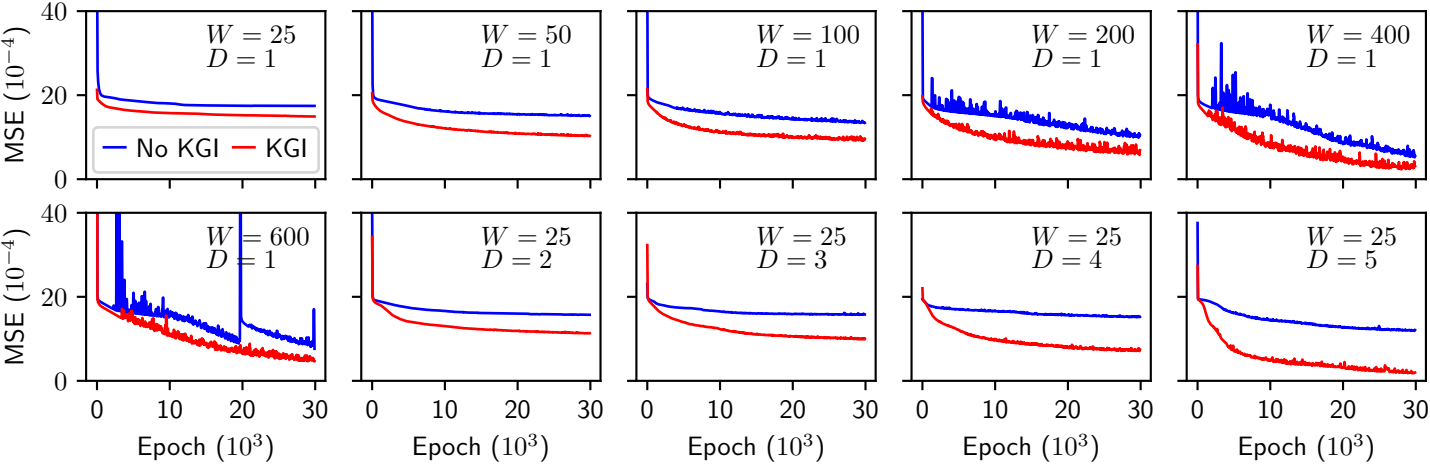

Supplement: supplementary_material [file attachment]

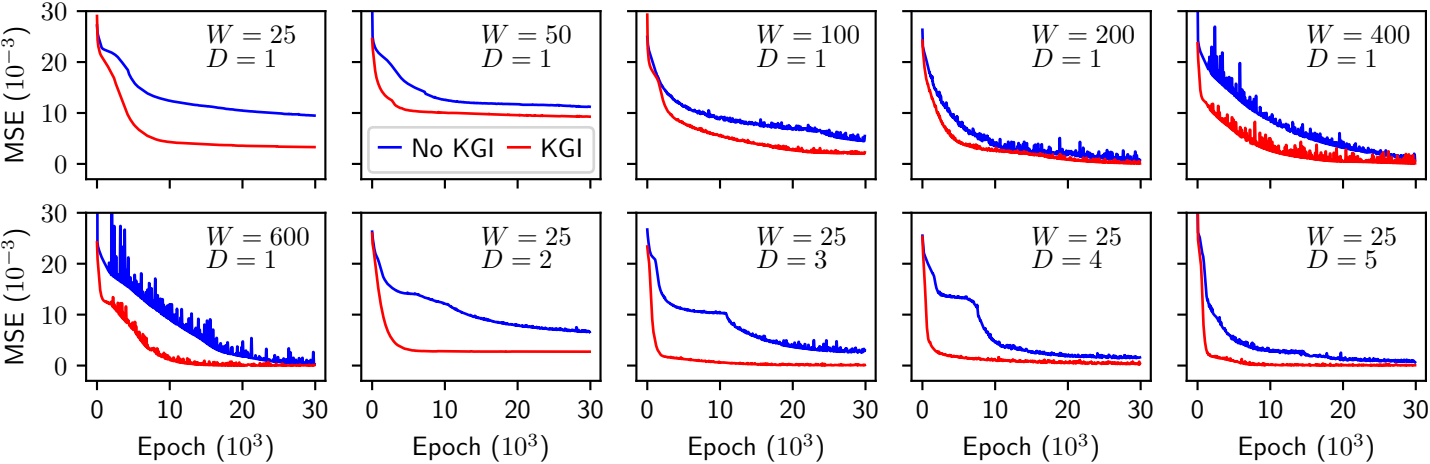

Supplement: supplementary_material [file attachment]

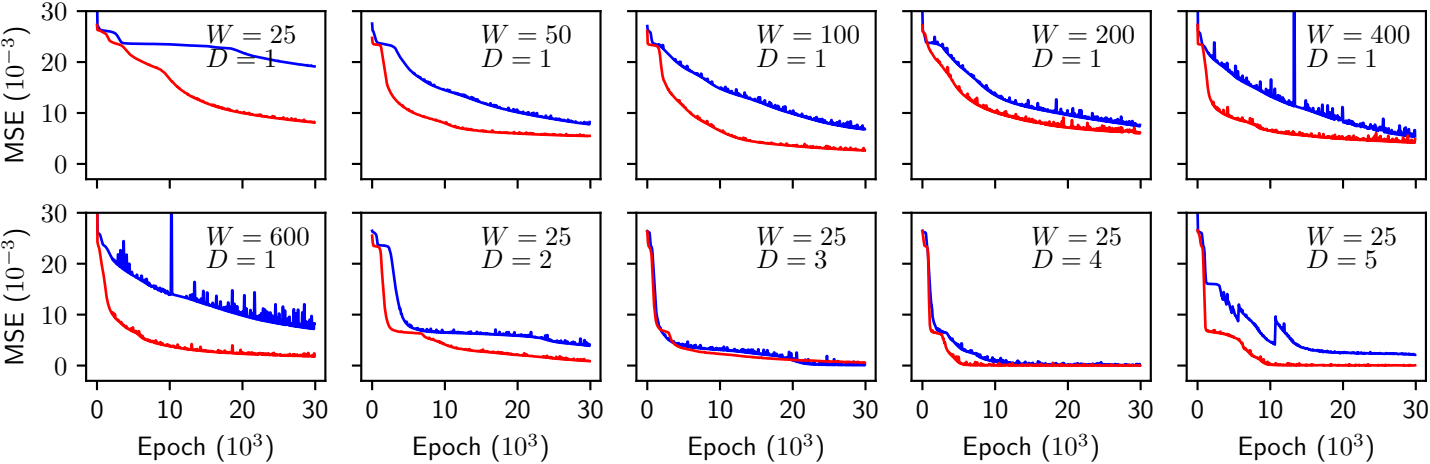

Supplement: supplementary_material [file attachment]

Images

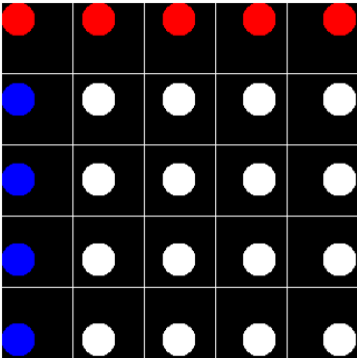

Encode  
→

Disentangled  $(x, y)$ 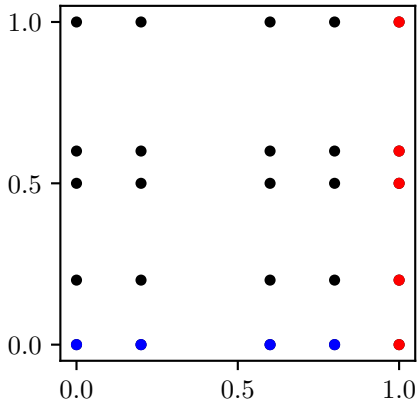

Supplement: supplementary_material [file attachment]

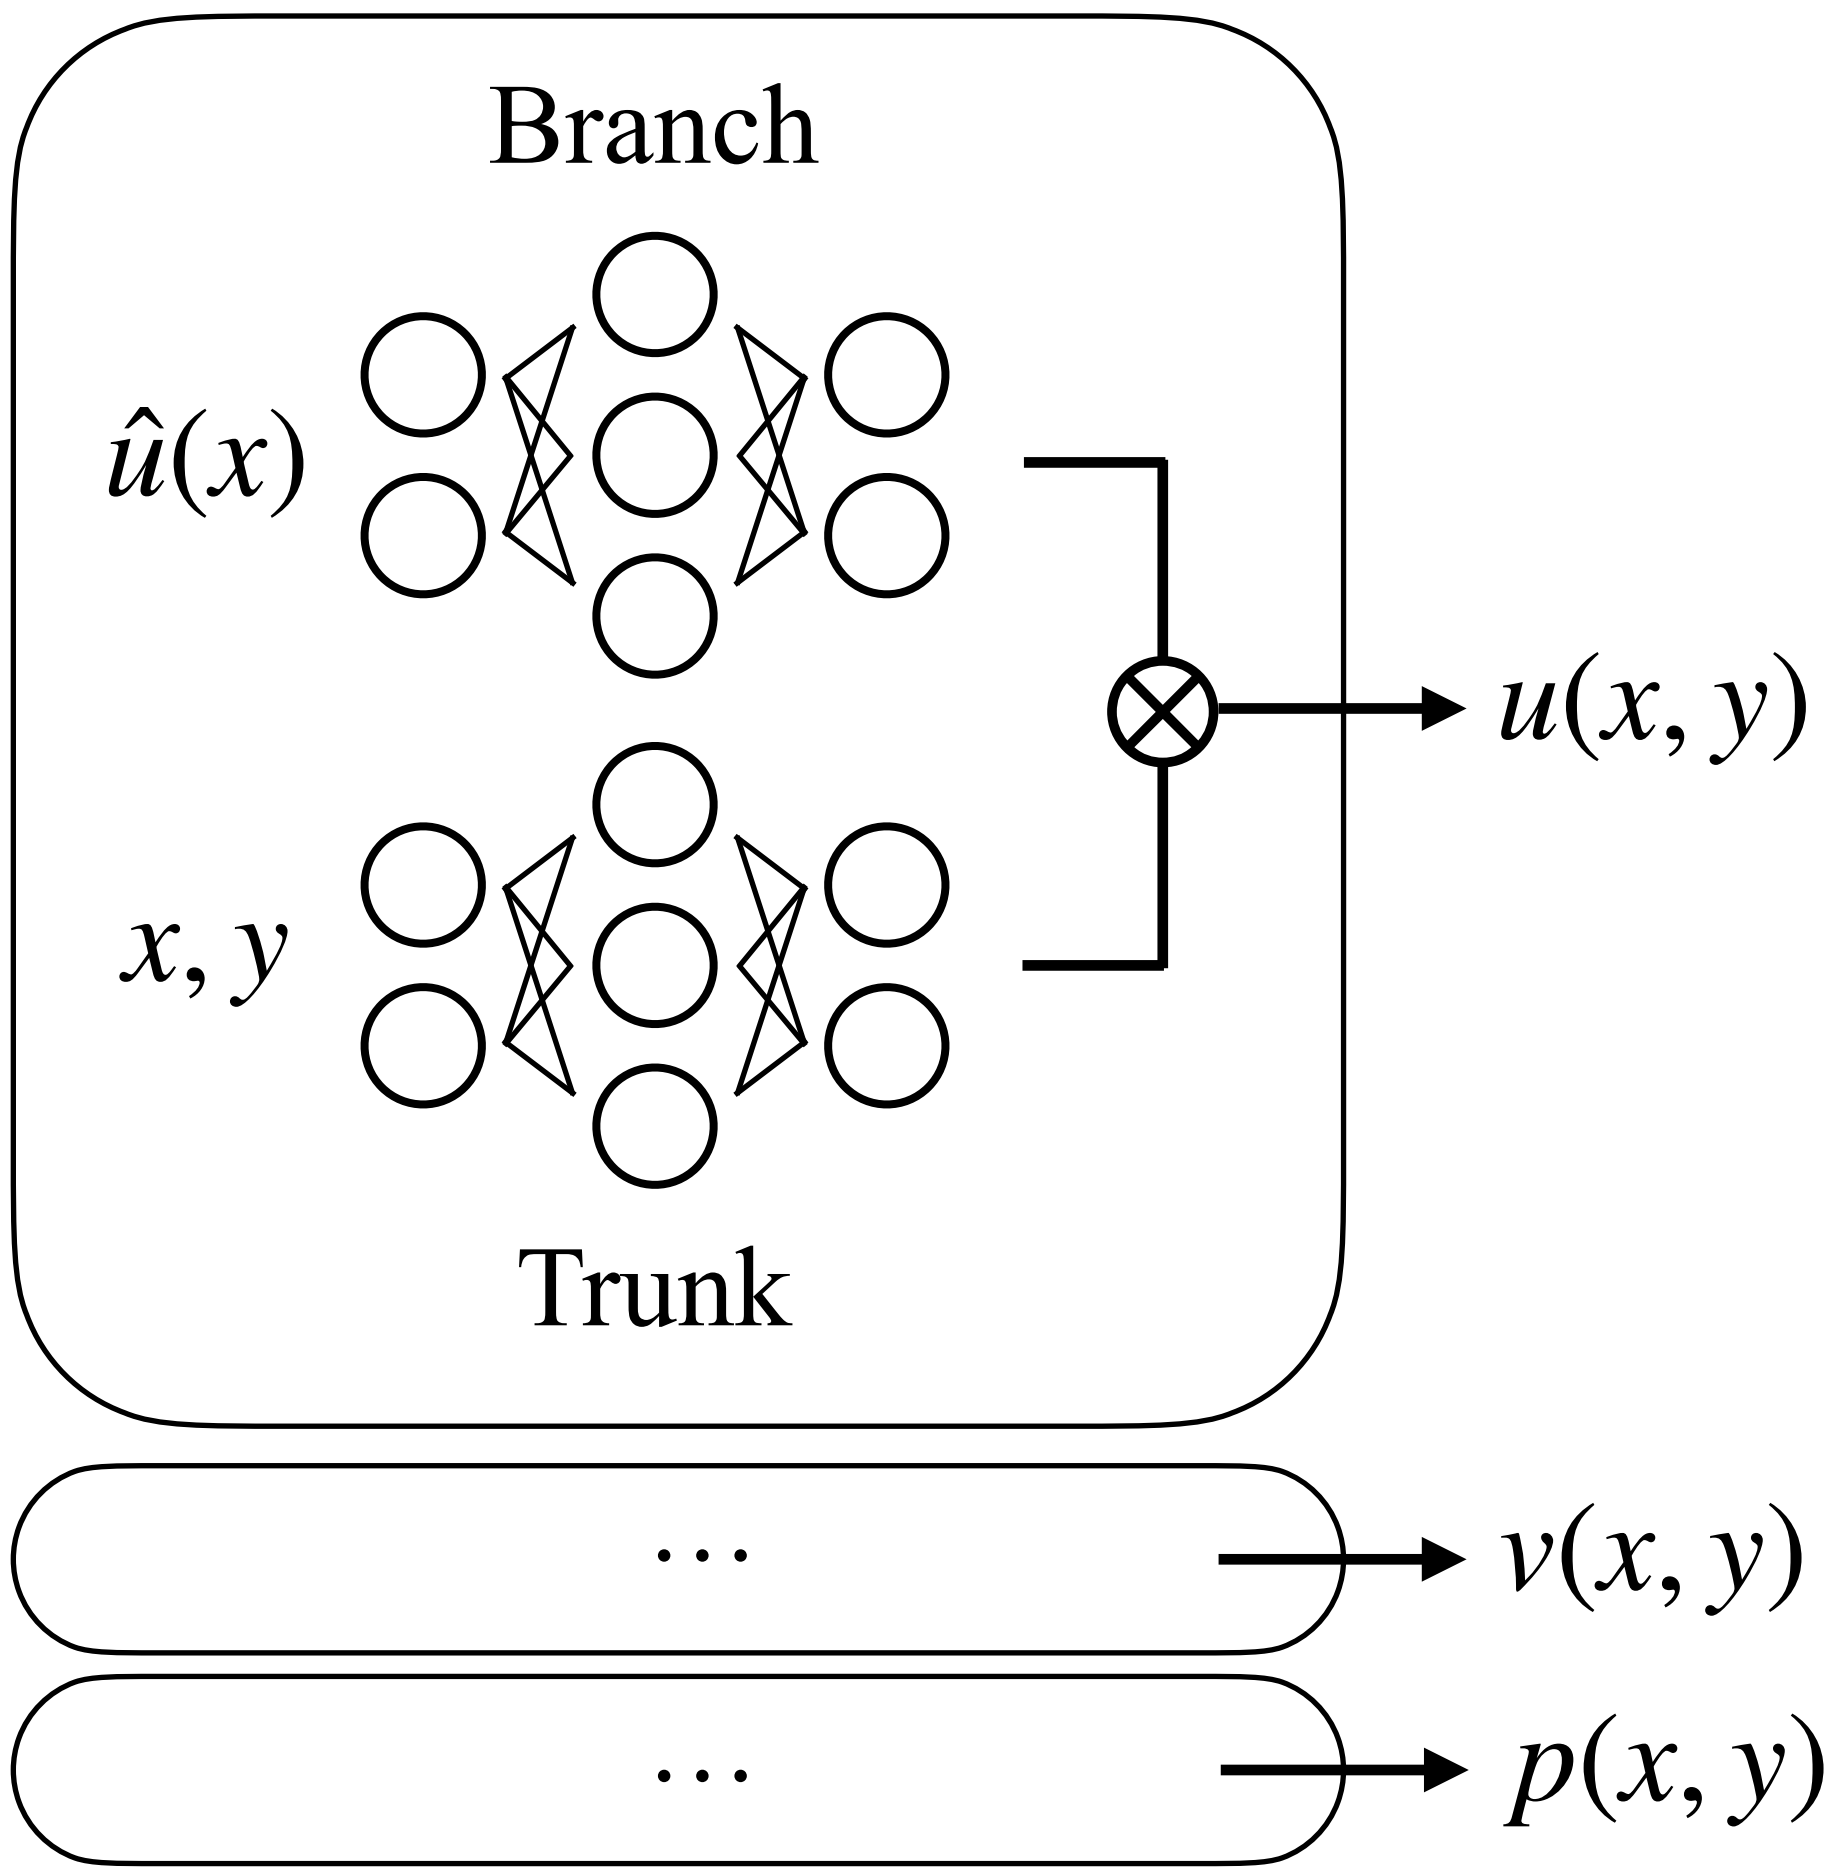

Supplement: supplementary_material [file attachment]

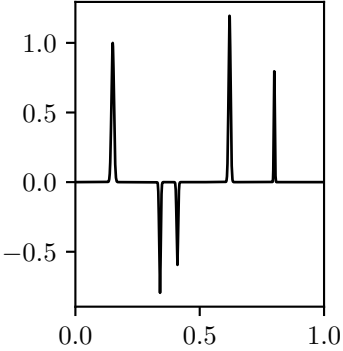

Supplement: supplementary_material [file attachment]

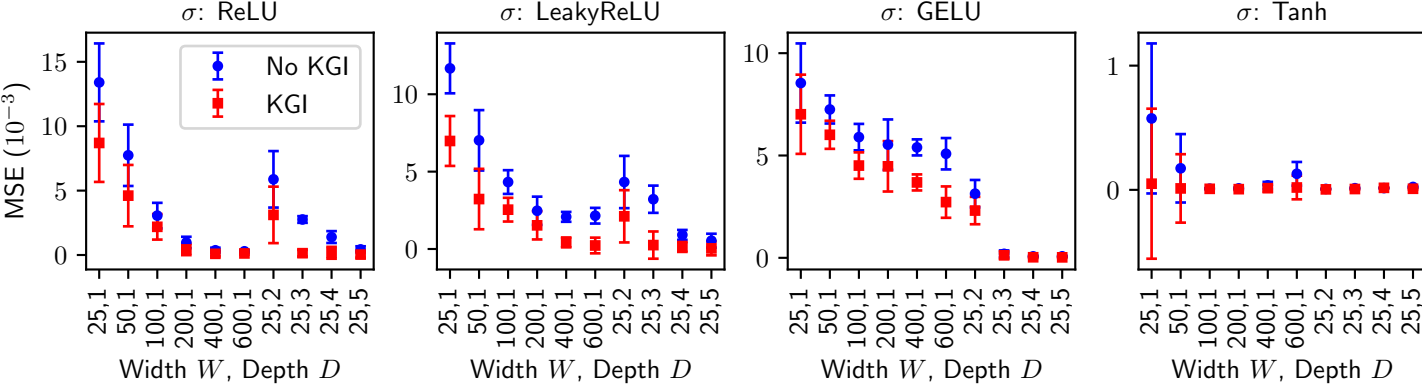

Supplement: supplementary_material [file attachment]

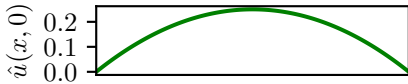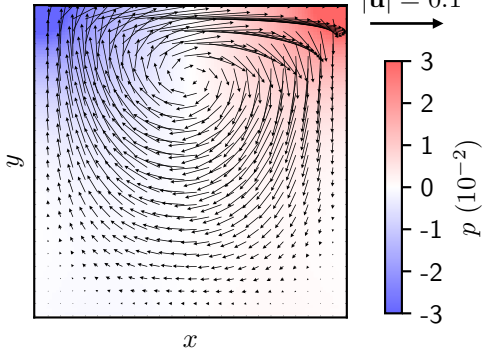

Supplement: supplementary_material [file attachment]

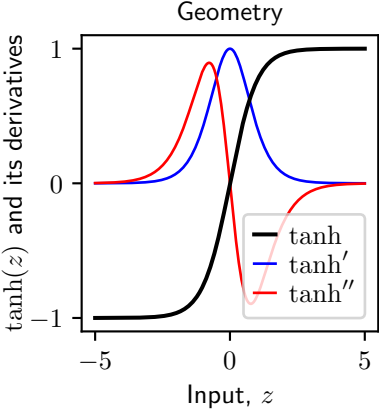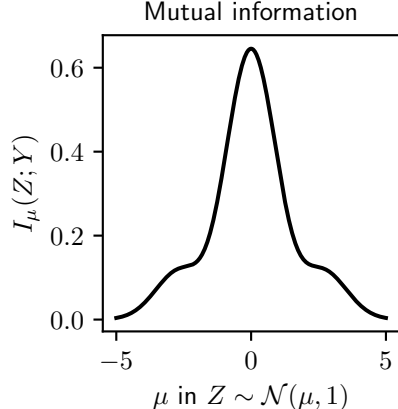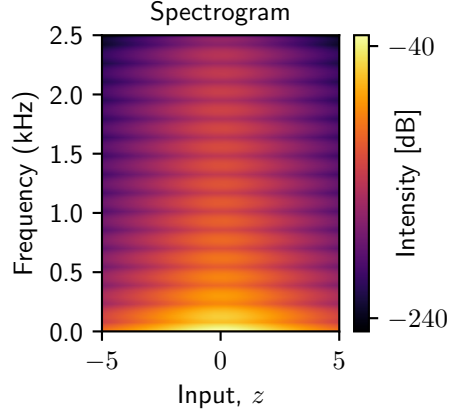

Supplement: supplementary_material [file attachment]

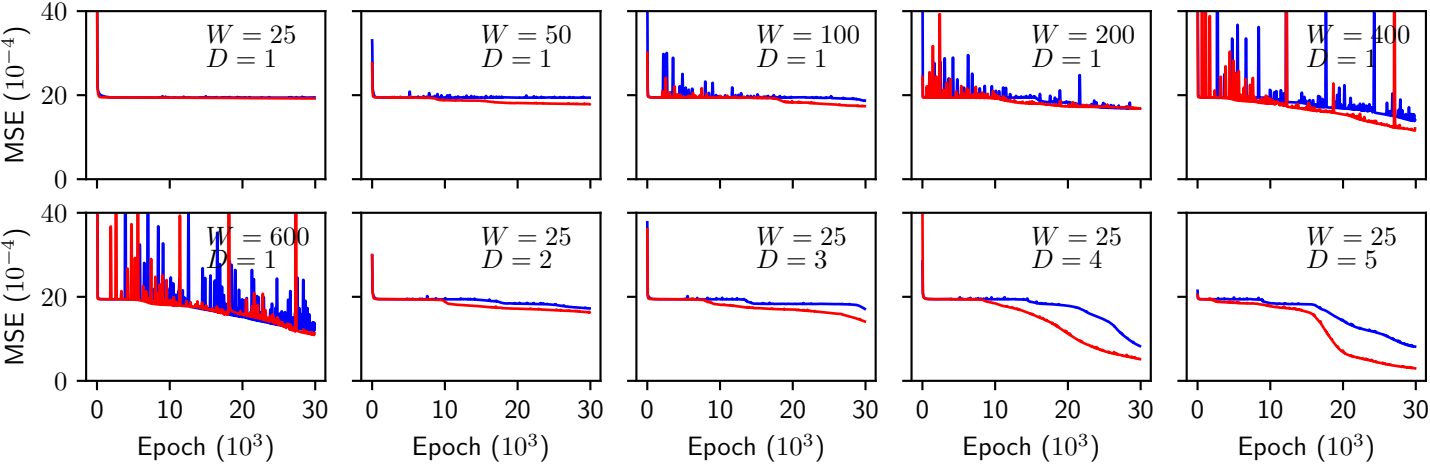

Supplement: supplementary_material [file attachment]

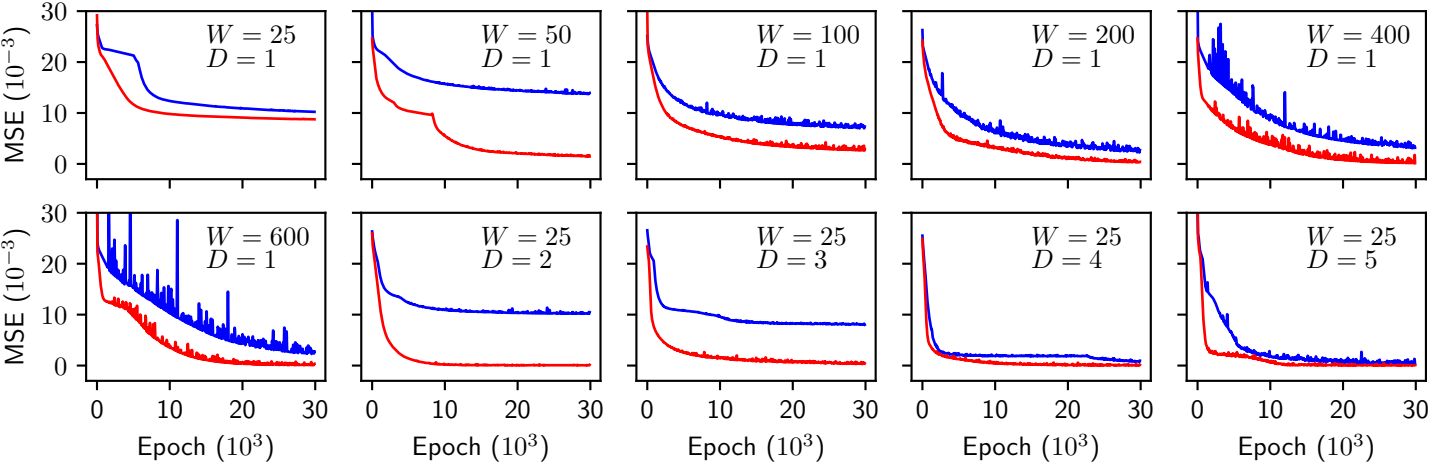

Supplement: supplementary_material [file attachment]

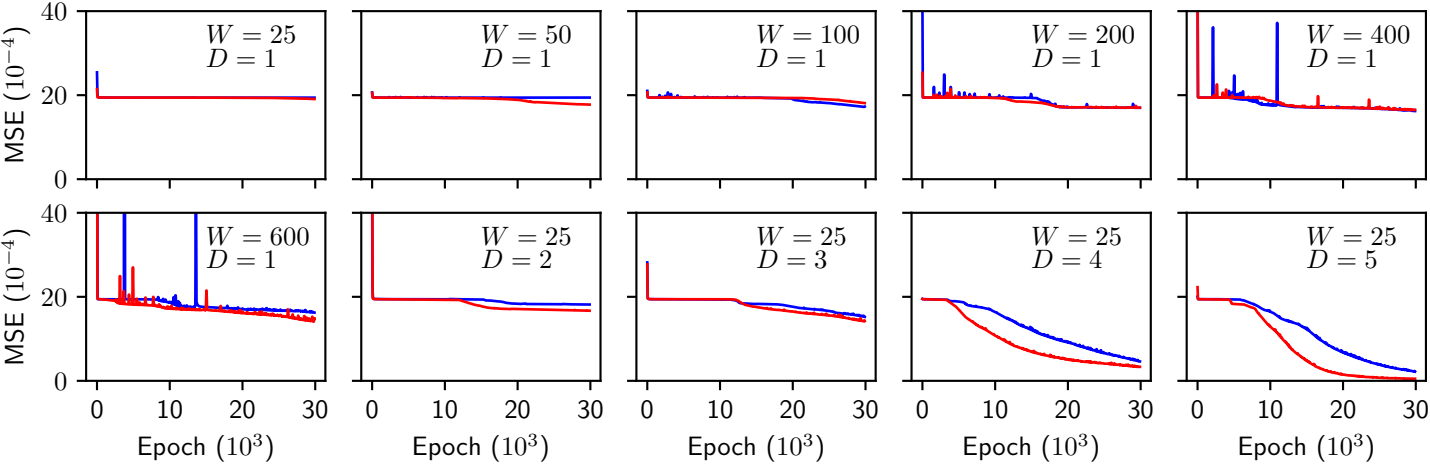

Supplement: supplementary_material [file attachment]

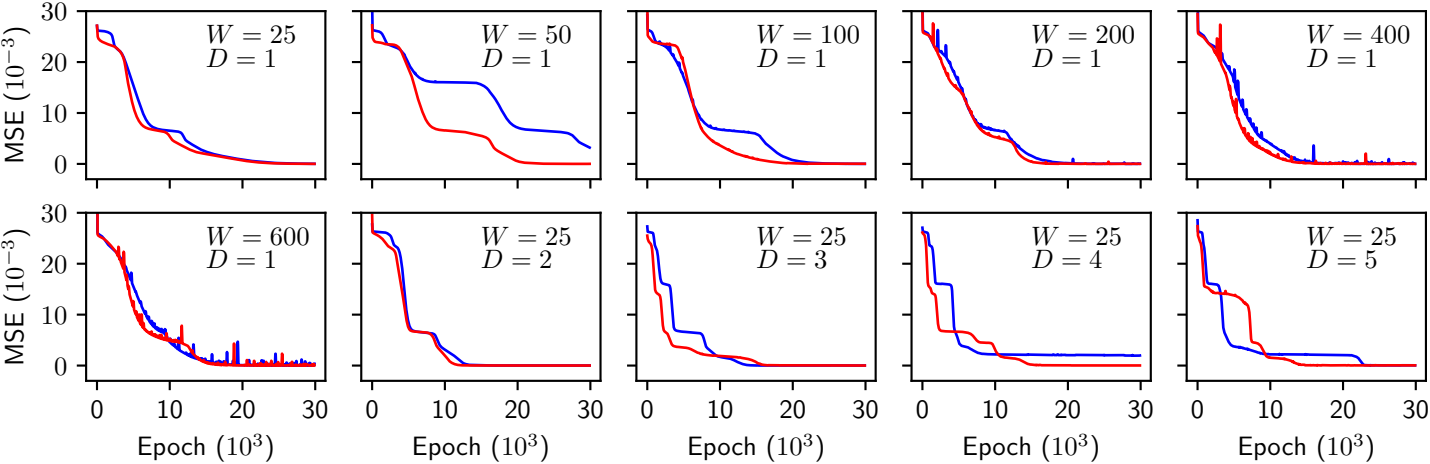

Supplement: supplementary_material [file attachment]

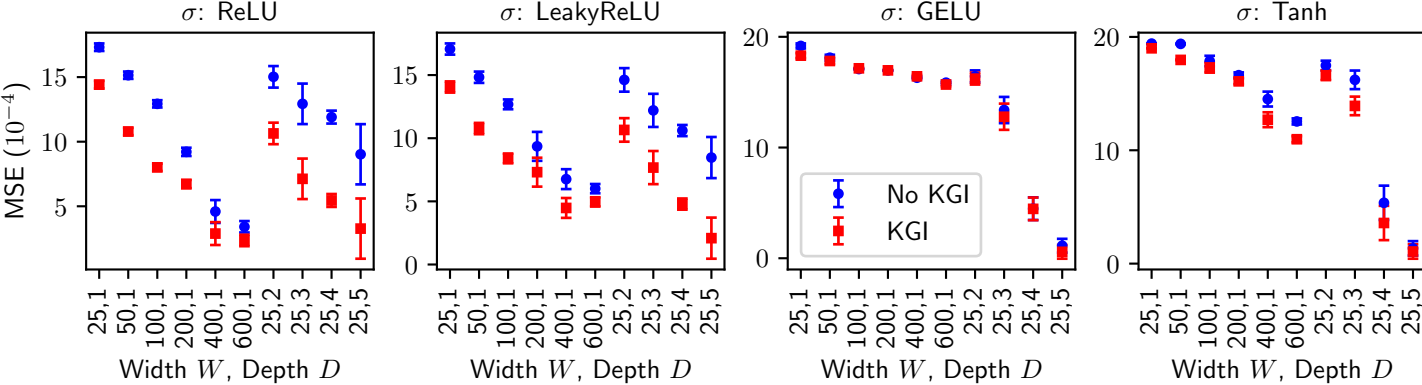

Supplement: supplementary_material [file attachment]
